# Supplementary material for: Two-dimensional glass transition–like behavior of Janus particle–laden interface
Source: Springer Nature journal article supplement (doi:10.1007/s00397-023-01389-w), 2023-03-22
Supplement: MOESM1 [file 24663694]

## **Supporting Information**

# **Two-dimensional glass-transition-like behavior of Janus particle-laden interface**

*Elton L. Correia<sup>1</sup>, H. Henning Winter<sup>2</sup>, Sepideh Razavi<sup>1\*</sup>*

<sup>1</sup>School of Chemical, Biological, and Materials Engineering, University of Oklahoma, 100 E. Boyd Street, Norman, OK 73019, USA;

<sup>2</sup>Department of Chemical Engineering and Department of Polymer Science and Engineering, University of Massachusetts Amherst, MA 01003, USA

Corresponding author's email: [srazavi@ou.edu](mailto:srazavi@ou.edu)

## **Images of the monolayer formed by Janus particles after deposition onto the air-water interface**

The following micrographs were generated with A NIMA Langmuir trough (Biolin Scientific) equipped with an imaging window machined in the center mounted on top of an inverted microscope (IX73 Olympus). The imaging of the particle-laden interface was carried out using a 20x objective (6.6-7.8 WD, 0.45 NA). The trough is supported by a moving stage (Applied Scientific Instrumentation) and thus the trough position can be controlled precisely. Therefore, it is possible to image the microstructure at different locations throughout the monolayer for a better representation of the surface monolayer as shown in Figure S1.

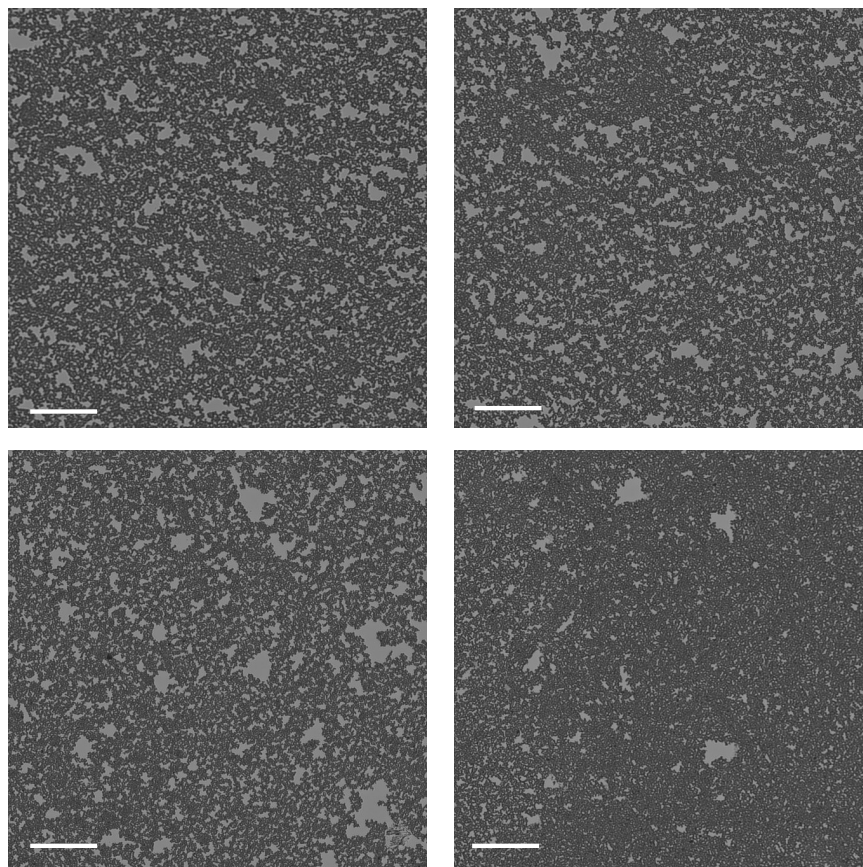

*Figure S1 – Micrographs of the interfacial monolayer formed by Janus particles at the air-water interface sampled at different locations within the interface. Scale bar is 10  $\mu\text{m}$ .*

## **SEM images of Janus particles transferred from the air-water interface onto a silicon wafer**

Scanning Electron Microscope (SEM) images were collected for particles deposited on a substrate examples of which are provided in Figure S2. The SEM utilized was a Field Emission environmental SEM from Thermo. For the image acquisition, we utilized an accelerating voltage of 10.00 kV and a working distance of 9.7 mm.

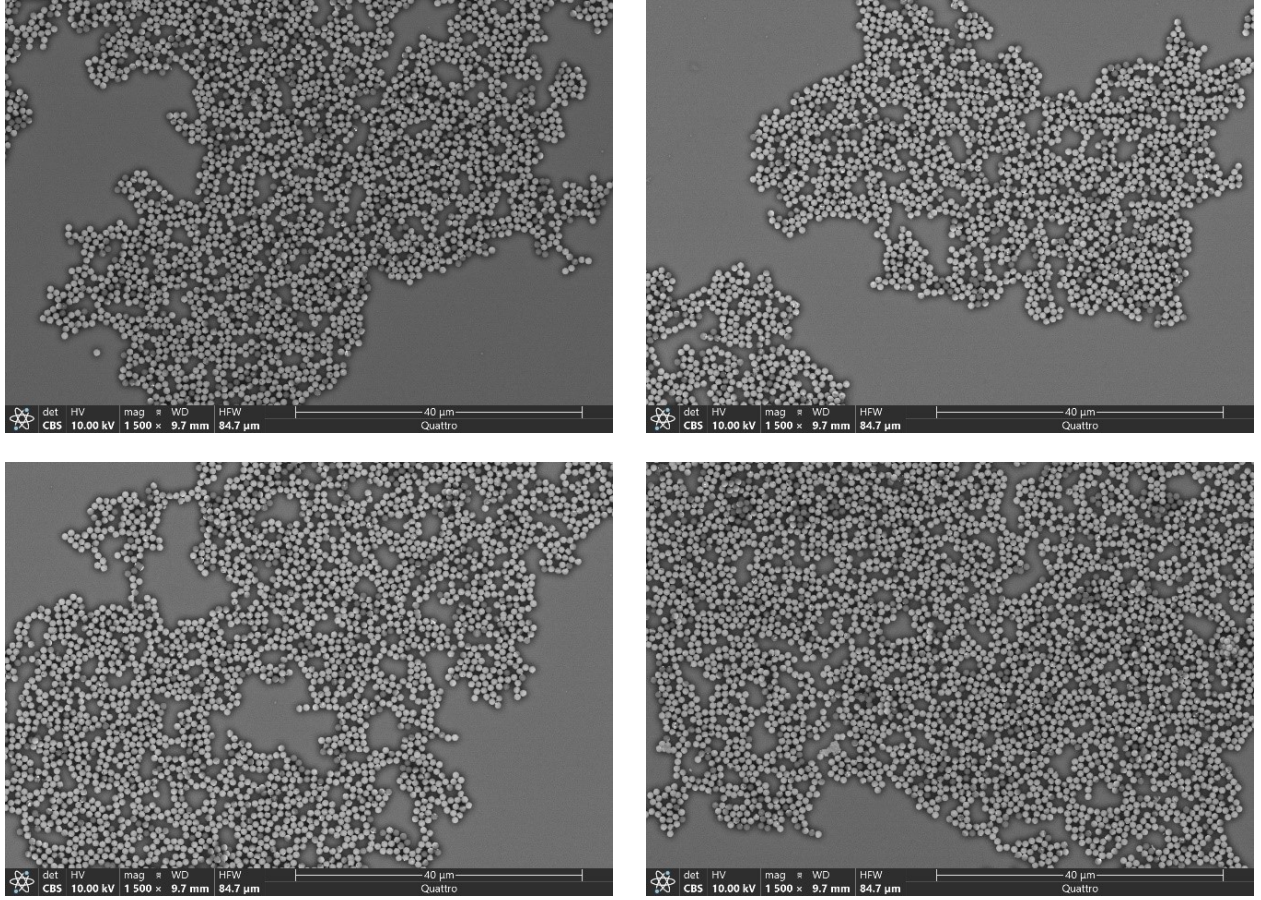

Figure S2 – SEM pictures of interfacial monolayer of Janus particles formed at the air-water interface imaged after transferring to a silicon wafer from the air-water interface.

From the captured SEM images, examples of which are shown in Figure S2, we calculated the crystallinity order parameter  $C_6$  (Juárez and Bevan 2012), which is defined as the number of hexagonally packed neighbors of a specific particle. The number of neighbors ( $N_c^k$ ) to the particle  $k$  are all particles  $j$  within a coordination radius ( $r_c$ ). Identification of crystalline neighbors for particle  $k$  is based on a six-fold orientation order parameter for that particle, ( $\psi_6^k$ ), which is calculated as follows:

$$\psi_6^k = \frac{1}{N_c^k} \sum_{j=1}^{N_c^k} [e^{i6\theta_{kj}} \quad r_{kj} \leq r_c]$$

Next, we can calculate the crystalline connectivity ( $\chi_6^{kj}$ ) between particles  $k$  and  $j$ .

$$\chi_6^{kj} = \frac{|Re[\psi_6^k \psi_6^{j*}]|}{|\psi_6^k \psi_6^{j*}|}$$

where  $\psi_6^{j*}$  is the complex conjugate of  $\psi_6^j$ . The number of crystalline near neighbors ( $C_6^k$ ) for particle  $k$  is as follows:

$$C_6^k = \sum_{j=1}^{N_c^k} \left[ \begin{array}{l} 1 \\ 0 \end{array} \middle| \begin{array}{l} \chi_6^{kj} \geq 0.32 \\ \chi_6^{kj} < 0.32 \end{array} \right]$$

Which is based on a criterion that a connection between particles  $k$  and  $j$  only to be crystalline for  $\chi_6^{kj} \geq 0.32$ . Finally, we can calculate the ensemble average over all particles ( $\langle C_6 \rangle$ ) as:

$$\langle C_6 \rangle = \frac{1}{N} \sum_{k=1}^N C_6^k$$

Following this procedure, and using  $\sim 50,000$  particles imaged via SEM in this analysis, we estimated the  $\langle C_6 \rangle$  of our particle system to be  $\sim 2.0 \pm 0.1$ . Our data analysis was done on a modified version of the software HEXI (Domonkos, Jackivová, and Pathó 2022). In short, HEXI identifies individual particles and determines their position. With that information one can calculate the beforementioned properties.

## References

- Domonkos, Mária, Rajisa Jackivová, and Andor Pathó. 2022. 'Image analysis algorithm for the verification of hexagonal symmetry in spherical nanostructures', *Microelectronic Engineering*, 251: 111635.
- Juárez, Jaime J, and Michael A Bevan. 2012. 'Feedback controlled colloidal self-assembly', *Advanced Functional Materials*, 22: 3833-39.
